# Supplementary material for: Pilot Randomised Evaluation of Singing in Dementia (PRESIDE): protocol for a two-arm, parallel group randomised controlled feasibility study with waiting-list control
Source: Research Square preprint supplement (doi:10.21203/rs.3.rs-44887/v2), 2020-10-27
Supplement: Supplementary file 1 [file d270fa2f90823dd891db0214.docx]

**Names and contact details of PRESIDE study protocol authors**

Dr Becky Dowson

[Becky.Dowson@nottingham.ac.uk](mailto:Becky.Dowson@nottingham.ac.uk)

Professor Justine Schneider

[Justine.Schneider@nottingham.ac.uk](mailto:Justine.Schneider@nottingham.ac.uk)

Dr Boliang Guo

[Boliang.Guo@nottingham.ac.uk](mailto:Boliang.Guo@nottingham.ac.uk)

Professor Philip M Bath DSc FMedSci

[Phlip.Bath@nottingham.ac.uk](mailto:Phlip.Bath@nottingham.ac.uk)

Dr Orii McDermott

[Orii.McDermott@nottingham.ac.uk](mailto:Orii.McDermott@nottingham.ac.uk)

Lee J Haywood

[Lee.Haywood@nottingham.ac.uk](mailto:Lee.Haywood@nottingham.ac.uk)

Professor Martin Orrell FRCPsych PhD

[Martin.Orrell@nottingham.ac.uk](mailto:Martin.Orrell@nottingham.ac.uk)
